# Supplementary material for: A Longitudinal Study of the Antioxidant Barrier and Oxidative Stress in Morbidly Obese Patients after Bariatric Surgery. Does the Metabolic Syndrome Affect the Redox Homeostasis of Obese People?
Source: J Clin Med. 2020 Apr 1;9(4):976. doi: 10.3390/jcm9040976 (PMC7230760; doi:10.3390/jcm9040976)
Supplement: Supplementary file 1 [file jcm-09-00976-s001.xlsx]

## Sheet: Table S1
Morbid obesity without metabolic syndrome (OB) patients
Number of case	Height (m)	Weight (kg) 0	Weight (kg) 1	Weight (kg) 3	Weight (kg) 6	Weight (kg) 12	BMI (kg/m²) 0	BMI (kg/m²) 1	BMI (kg/m²) 3	BMI (kg/m²) 6	BMI (kg/m²) 12	Waist circumference (cm) 0	Waist circumference (cm) 1	Waist circumference (cm) 3	Waist circumference (cm) 6	Waist circumference (cm) 12	Hips circumferences (cm) 0	Hips circumferences (cm) 1	Hips circumferences (cm) 3	Hips circumferences (cm) 6	Hips circumferences (cm) 12	WHR 0	WHR 1	WHR 3	WHR 6	WHR 12	Glucose (mg/dL) 0	Glucose (mg/dL) 1	Glucose (mg/dL) 3	Glucose (mg/dL) 6	Glucose (mg/dL) 12	Cholesterol (mg/dL) 0	Cholesterol (mg/dL) 1	Cholesterol (mg/dL) 3	Cholesterol (mg/dL) 6	Cholesterol (mg/dL) 12	LDL (mg/dL) 0	LDL (mg/dL) 1	LDL (mg/dL) 3	LDL (mg/dL) 6	LDL (mg/dL) 12	TG (mg/dL) 0	TG (mg/dL) 1	TG (mg/dL) 3	TG (mg/dL) 6	TG (mg/dL) 12	HDL (mg/dL) 0	HDL (mg/dL) 1	HDL (mg/dL) 3
1	1.75	129	117	100		88	42.1224	38.2041	32.6531		28.7347	136					131					1.03817					91	90	91	93	98	193	191	183	195	196	113	105	93	98	105	139	127	113	121	98	54	53	47
2	1.62	106		85	78	75	40.3902		32.3884	29.7211	28.578	118		110	105	102	124		119	112	111	0.951613		0.92437	0.9375	0.918919	92	98	91		86	190	158	156	164	188	128	98	91	103	114	197	194	177	79	182	33	31	30
3	1.72	121	114	99	90		40.9005	38.5343	33.464	30.4218		134	127	115	105	94	130	125	120	112	103	1.03077	1.016	0.958333	0.9375	0.912621	102	101	97	96	95	210	202	176	209	187	125	120	113	113	113	127	130	137	182	164	49	30	36
4	1.7	141	127	115	103	87	48.7889	43.9446	39.7924	35.6401	30.1038	138					150					0.92					93	87	91	95	87	197	175	217	212	178	117	118	142	139	134		84	142	143	125		41	47
5	1.57	99	93	84	75	68	40.1639	37.7297	34.0785	30.4272	27.5873	116	112	107	101	93	117	112	106	103	98	0.991453	1	1.00943	0.980583	0.94898	98	84	94			147	124	144	114	114	103	99	99	61	59	88	75	71	48	36	39	38	37
6	1.64	132	120	103	95	82	49.0779	44.6163	38.2957	35.3212	30.4878	137	130	121	110	97	145	140	132	118	105	0.944828	0.928571	0.916667	0.932203	0.92381	107	97		94	92	179	154	177	181	179	148	83	115	118	120	96	164	101	110	113	56	41	49
7	1.58	123	114	100	89	79	49.271	45.6658	40.0577	35.6513	31.6456	144	132	124	110	95	138	131	122	113	100	1.04348	1.00763	1.01639	0.973451	0.95	85	109	84	82	84	180	166	205	189	177	133	116	159	144	129	113	86	84	88	70	46	31	45
8	1.62	106	90	81	74	67	40.3902	34.2936	30.8642	28.1969	25.5296	113	105	99	94	92	128	120	112	105	96	0.882812	0.875	0.883929	0.895238	0.958333	84	74	79	79		157	129	161	176	163	120	97	109	129	103	109	75	96	75	55	41	34	45
9	1.68	150		124	113	104	53.1463		43.9342	40.0368	36.8481	147		129	116	105	148		127	118	107	0.993243		1.01575	0.983051	0.981308	90	87	81	81	81	158	147	164	152	146	103	89	104	96	96	132	139	115	91	85	46	106	41
10	1.67	125	112	103	96		44.8205	40.1592	36.9321	34.4222		137	130	123	112		141	132	123	116		0.971631	0.984848	1	0.965517		91	115	85	78	75	209	196	180	169	158	139	96	102	97	93	110	155	104	99	90	61	62
11	1.64	117	115		93	81	43.5009	42.7573		34.5776	30.116	136	125		100	92	140	134		108	97	0.971429	0.932836		0.925926	0.948454	118		142	103	111	164		120	129	144	102		69	70	77	134		93	89	111	36		33
12	1.64	144	130	117	105	94	53.5396	48.3343	43.5009	39.0393	34.9494	149	134	120	108	96	151	138	129	117	103	0.986755	0.971014	0.930233	0.923077	0.932039	89	98	93		80	163	155	153	169	182	102	95	93	93	90	75	91	83	80	78	55	44	54
13	1.58	137	123	117	105	94	54.879	49.271	46.8675	42.0606	37.6542	148	135	122	109	98	153	141	130	117	108	0.96732	0.957447	0.938462	0.931624	0.907407	106		102	109	96	198	185		221	231	124	135		166	120	75	68		80	80	42	56
14	1.62	119	112	98	89	79	45.3437	42.6764	37.3419	33.9125	30.1021	141	132	123	110	93	140	135	123	115	105	1.00714	0.977778	1	0.956522	0.885714	100	114		101	93	201	180	198	185	156	130	113	145	164	118	165	209	56	126	105	60	41	141
15	1.68	114	91	80	74	68	40.3912	32.2421	28.3447	26.2188	24.093	124	120	116	101	90	132	125	117	104	95	0.939394	0.96	0.991453	0.971154	0.947368	84	79	81	87	79	208	175	154	166	143	159	135	112	112	115	73	85	46	58	61	58	54	61
16	1.6	115	98	93	81	73	44.9219	38.2812	36.3281	31.6406	28.5156	122	105	97	88	84	135	125	116	107	104	0.903704	0.84	0.836207	0.82243	0.807692	95	89	85	82	80	205	189		178	167	151	119		105	116	145	129		104	104		55
17	1.65	112			79	70	41.1387			29.0174	25.7117	124	118			86	136	127			100	0.911765	0.929134			0.86	98	78	69	87	93	184	147	199	201	183	114	93	140	148	110	174	102	116	124	100	45	37	47
18	1.65	115		91	83	71	42.2406		33.4252	30.4867	26.079	117		103	97	90	137	131	125	113	101	0.854015		0.824	0.858407	0.891089	99	89	86	85	85	162	156		166	134	118	95		104	99	62	66		50	62	59	54
19	1.67	115	102	89	79	69	41.2349	36.5736	31.9122	28.3266	24.7409	116	101	105	98	86	143	137	131	108	97	0.811189	0.737226	0.801527	0.907407	0.886598	109	98	93	102		231	204	193	203	196	154	153	130	142	129	125	109	107	123	106	62	45	54
20	1.58	115	102	90	78	69	46.0663	40.8588	36.0519	31.245	27.6398	130					137					0.948905					76	69	60	68	79	171	130	134	136	157	113	91	79	83	86	183	99	113	72	65	39	30	27
21	1.64	109	98	89			40.5265	36.4366	33.0904			120	114	106			125	115	109			0.96	0.991304	0.972477				81	70	84	80	222	202	164	184	204		138	101	109	118	176	107	103	111	66	55	68	61
22	1.6	116	104	95	82	75	45.3125	40.625	37.1094	32.0312	29.2969	133	125	109	97	83	135	128	120	108	95	0.985185	0.976562	0.908333	0.898148	0.873684	98	93	91	83	85	189	176	177	169	176	126	119	130	115	111	90	91	85	62	52	38	39	43
23	1.72	142	128	115	103	85	47.9989	43.2666	38.8724	34.8161	28.7317	137	129	117	108	95	145	138	124	111	104	0.944828	0.934783	0.943548	0.972973	0.913462	122		88		84	210		184	161		148		104			176			112
24	1.58	115	100		82	73	46.0663	40.0577		32.8473	29.2421	132	125		105	91	139	133		112	100	0.94964	0.93985		0.9375	0.91	103	92	92	92	84	186	147	173	174	167	135	111	130	109	99	135	103	83	52	51	41	34	42
25	1.65	141		113	100	88	51.7906		41.506	36.7309	32.3232	141	128	112	96	87	139	130	118	109	102	1.01439	0.984615	0.949153	0.880734	0.852941	79	97	93	82	75	198	185			176		112			113		108			98	61	61
26	1.58	116	105	96	85	76	46.4669	42.0606	38.4554	34.049	30.4438	138	124	110	97	86	139	132	118	108	99	0.992806	0.939394	0.932203	0.898148	0.868687	98	99	80	83	81	201	186	186	167	209	141	129	106	94	87	127	199	182	113	110	45	42	50
27	1.58	110	100	88	79	71	44.0635	40.0577	35.2508	31.6456	28.441	129					135					0.955556					105	96	90		86	214	210	198	232	156	155	129	109	111	114	119	105	97	87	88	58	59	55
28	1.64	125	113	108	98	91	46.4753	42.0137	40.1547	36.4366	33.834	125	117	108	101	92	135	132	128	124	111	0.925926	0.886364	0.84375	0.814516	0.828829	100	95		87		206	178	175	245	165	110	100	98	99	106	126	116	101	92	92	37	43	45
29	1.76	125	104	93	81	78	40.3538	33.5744	30.0232	26.1493	25.1808	110	100	90	85	81	130	120	109	103	101	0.846154	0.833333	0.825688	0.825243	0.80198	91	89	85	78	73	162	157	145	237		122	107	112	110		125	120	118	100		48	47	47
30	1.64	122	110	102		85	45.3599	40.8983	37.9239		31.6032	136	128	115		98	140	131	119		112	0.971429	0.977099	0.966387		0.875	112	100	88	80	79	215	203		186		119	105		107		130	119		96		59	61
31	1.58	105		82	74	68	42.0606		32.8473	29.6427	27.2392	112		96	82	78	123		112	100	94	0.910569		0.857143	0.82	0.829787	94		86	83	85	168	145	148	173	134	100	95	97	94	117	147	129	120	100	110	54	54	55
32	1.6	110	93	81	72	63	42.9688	36.3281	31.6406	28.125	24.6094	123	120	117	102	93	129	123	115	105	99	0.953488	0.97561	1.01739	0.971429	0.939394	110	102	95	85		198	184	190	179		128	121	121	110	116	138	118	105	99	105	50	50	53
33	1.64	169	156		88	79	62.8346	58.0012		32.7186	29.3724	134	126	111		85	142	135	125		101	0.943662	0.933333	0.888		0.841584		95			84	201	172	215	182	200	157	119	105	99	127	168	143	105	120	132	51	55	52
34	1.71	120	103	92	85	82	41.0383	35.2245	31.4627	29.0688	28.0428	126	125	120	114	108	132	128	126	124	118	0.954545	0.976562	0.952381	0.919355	0.915254	88	93	88	83	80	180	165	165	168		108	110	98	111	112	139	111	99	90	100	58	50	61
Morbid obesity with metabolic syndrome (OB + MS) patients
Number of case	Height (m)	Weight (kg) 0	Weight (kg) 1	Weight (kg) 3	Weight (kg) 6	Weight (kg) 12	BMI (kg/m²) 0	BMI (kg/m²) 1	BMI (kg/m²) 3	BMI (kg/m²) 6	BMI (kg/m²) 12	Waist circumference (cm) 0	Waist circumference (cm) 1	Waist circumference (cm) 3	Waist circumference (cm) 6	Waist circumference (cm) 12	Hips circumferences (cm) 0	Hips circumferences (cm) 1	Hips circumferences (cm) 3	Hips circumferences (cm) 6	Hips circumferences (cm) 12	WHR 0	WHR 1	WHR 3	WHR 6	WHR 12	Glucose (mg/dL) 0	Glucose (mg/dL) 1	Glucose (mg/dL) 3	Glucose (mg/dL) 6	Glucose (mg/dL) 12	Cholesterol (mg/dL) 0	Cholesterol (mg/dL) 1	Cholesterol (mg/dL) 3	Cholesterol (mg/dL) 6	Cholesterol (mg/dL) 12	LDL (mg/dL) 0	LDL (mg/dL) 1	LDL (mg/dL) 3	LDL (mg/dL) 6	LDL (mg/dL) 12	TG (mg/dL) 0	TG (mg/dL) 1	TG (mg/dL) 3	TG (mg/dL) 6	TG (mg/dL) 12	HDL (mg/dL) 0	HDL (mg/dL) 1	HDL (mg/dL) 3
1	1.58	113	99	89	79	74	45.2652	39.6571	35.6513	31.6456	29.6427	136	129	118	110	100	139	129	120	113	107	0.978417	1	0.983333	0.973451	0.934579	112	99	96	96	93	185	181	178	190	175	139	137	122	114	102	134	133	135	130	112	54	50	55
2	1.66	125	111		90	85	45.3622	40.2816		32.6608	30.8463	135					140					0.964286					110	102	98	96	90		197	183	183	169		124	116	102	95		120	118	115	102		49	50
3	1.58	137		103	95	88	54.879		41.2594	38.0548	35.2508	147	141	135	121	102	152	145	136	124	107	0.967105	0.972414	0.992647	0.975806	0.953271	115	110	92	91	87	222	210	186	188		150	132	121	121		127	118	120	120		43	45	47
4	1.65	126	113	107	95	85	46.281	41.506	39.3021	34.8944	31.2213	143	135	122	110	101	136	130	121	115	107	1.05147	1.03846	1.00826	0.956522	0.943925	121	111	92	106		178	183	175	171	173	132	110	110	99	87	137	140	145	132	115	31	48	48
5	1.62	125	113	109	99	89	47.6299	43.0575	41.5333	37.7229	33.9125	144	136	128	117	103	146	138	126	115	110	0.986301	0.985507	1.01587	1.01739	0.936364		147	110	102	98	176	142	152	167	165	145	126	119	87	101	255	187	164	141	127	51	33	39
6	1.75	130	114	102	92	84	42.449	37.2245	33.3061	30.0408	27.4286	132					137					0.963504					189	130	109	100	97	205	200	187	191	187	129	117	108	96	88	231	190	167	120	125	50	52	56
7	1.64	140	125	112	101	92	52.0523	46.4753	41.6419	37.5521	34.2058	161	152	138	130	108	139	132	123	115	113	1.15827	1.15152	1.12195	1.13043	0.955752	105	98	97	94	94	181	186	180		175	128	113	99		76	115	120	125		98	33	40	47
8	1.55	110	97	88	80	73	45.7856	40.3746	36.6285	33.2986	30.385	140	135	123	110	97	147	138	125	112	101	0.952381	0.978261	0.984	0.982143	0.960396		136	100		92	239	216	201	205	198	158	110	104	95	89	110	102	100	89	93	39	39	38
9	1.65	124	120	109	102	100	45.5464	44.0771	40.0367	37.4656	36.7309	143	138	135	130	115	145	139	136	133	125	0.986207	0.992806	0.992647	0.977444	0.92	101		94	90	87	195	192	186			139	123	113			130	127	126			36	45	46
10	1.64	133	120	109	99		49.4497	44.6163	40.5265	36.8084		141	134	125	115		145	137	126	118		0.972414	0.978102	0.992063	0.974576		98	89	83	89	85	201	221	172	197	159	141	78	115	143	93	127	108	95	91	77	35	39	47
11	1.58	119		93	85	76	47.6686		37.2536	34.049	30.4438	133		118	110	100	158		142	127	105	0.841772		0.830986	0.866142	0.952381	120	94	89	157		205	210	120	148	145	123	128	50	83	89	191	367	240	167	130	51	41	41
12	1.53	94	95		76	64	40.1555	40.5827		32.4661	27.3399	128	122	115	102	84	132	125	120	110	96	0.969697	0.976	0.958333	0.927273	0.875		99		95	90	246	234		209	190	163	149		102	120	155	149		137	107	72	68
13	1.64	125	113.5	102	92	85	46.5266	41.625	39.3021	34.4163	31.2354	140	134	121	110	100	143	135	125	115	107	0.978864	0.988907	0.984	0.964444	0.934579	106	99	97	95	90	211	192	181	188	174	144	122	116	110	102	150	136	137	130	102	36	45	49
14	1.6	103	84	77	70	65	40.2344	32.8125	30.0781	27.3438	25.3906	120	115	101	92	82	115	111	108	103	97	1.04348	1.03604	0.935185	0.893204	0.845361	89	75	83	81		195	182	216	183	184	175	97	113	92	96	289	129	202	172	146	54	62	69
15	1.68	113	93	82	74	64	40.0368	32.9507	29.0533	26.2188	22.6757	127	122	115	108	99	123	119	117	115	110	1.03252	1.02521	0.982906	0.93913	0.9	106	99	101	101	90	229	151	191	264	138	149	70	103	134	99	125	75	78	108	68	64	65	69
16	1.68	170	160	138		112	60.2324	56.6893	48.8946		39.6825	150	143	132	126	112	172	164	151	139	125	0.872093	0.871951	0.874172	0.906475	0.896	105	100	90		87		192		187	180		115		110	109		126		128	100		45
17	1.6	110	98	89	80	72	42.9688	38.2812	34.7656	31.25	28.125	131	125	112	102	95	138	130	121	108	102	0.949275	0.961538	0.92562	0.944444	0.931373	91	91	79		77	167		131		142	143		69		64	104		94		59	35		49
18	1.63	124	110	100	92	83	46.6709	41.4016	37.6378	34.6268	31.2394	135	127	116	108	96	137	130	119	112	105	0.985401	0.976923	0.97479	0.964286	0.914286	110	99	94	87	84	233	184	174	197	183	173	122	110	140	126	143	174	115	116	77	55	37	56
19	1.68	113		88	79	70	40.0368		31.1791	27.9904	24.8016	130		114	105	92	135		117	111	102	0.962963		0.974359	0.945946	0.901961	95	90		92		262	195		220	203	165	142		126	116	164	139		136	98	43	46
20	1.54	125	113	102		84	52.707	47.6472	43.0089		35.4191	155	145	132		105	157	146		116	110	0.987261	0.993151			0.954545	106	112	107	99	97	258	219	208	230	217	181	158	150	130	120	232	182	142	103	76	63	50	53
21	1.67	157	146	135	124	112	56.2946	52.3504	48.4062	44.462	40.1592	157	150	139	130	116	158	149	141	135	120	0.993671	1.00671	0.985816	0.962963	0.966667	92	107	105	92	87	227	235	237	211	201	170	183	189	157	141	251	266	227	136	109	40	37	35
22	1.58	124	116	102	95	85	49.6715	46.4669	40.8588	38.0548	34.049	144					147					0.979592					146	124	105		97	181	157	164	156	151	128	103	143	94	103	122	92	223	120	99	55	40	52
23	1.64	146		109	97	89	54.2832		40.5265	36.0648	33.0904	149		128	116	101	150		130	118	112	0.993333		0.984615	0.983051	0.901786	119	91	97	96	90	221	126	176	212	179	158	66	122	144	164	174	145	137	214	138	42	31	36
24	1.54	110	99		83	75	46.3822	41.744		34.9975	31.6242	142	135		110	98	145	136		115	107	0.97931	0.992647		0.956522	0.915888	120		99	95		217	221	209	189	168	139	115	110	84	93	187	100	110	119	98	46		41
25	1.68	129	115	101	92	85	45.7058	40.7455	35.7851	32.5964	30.1162	135	124	106	100	97	138	119	106	101	102	0.978261	1.04202	1	0.990099	0.95098	102	97	97		87	219	201	176	175	170	122	110	105	93	100	151	155	146	139	130	37	45	45
26	1.58	124	114	105	97	90	49.6715	45.6658	42.0606	38.856	36.0519	141	133	120	110	98	147	140	128	115	105	0.959184	0.95	0.9375	0.956522	0.933333	99	99	98	98	95	225	187	181	183	171	155	135	124	110	104	149	152	150	142	125	33	38	45
27	1.62	160	145	131	125	86	60.9663	55.2507	49.9162	47.6299	32.7694	157	146	132	109	93	155	144	131	120	107	1.0129	1.01389	1.00763	0.908333	0.869159	106	105	100	97	96	204	185	178	178	167	126	120	125	111	109	108	102	105	105	86	47	51	50
28	1.68	140	127	118	109	99	49.6032	44.9972	41.8084	38.6196	35.0765	144	138	130	118	108	148	141	129	120	112	0.972973	0.978723	1.00775	0.983333	0.964286	133	110	105	99		268	228	207	200	295	168	122	145	124	118	128	130	133	127	98	48	48	52
29	1.7	127	114	102	93	85	43.9446	39.4464	35.2941	32.1799	29.4118	137	130	121	112	100	142	135	121	115	105	0.964789	0.962963	1	0.973913	0.952381		130	116		99	183	175	180	176	163	132	128	118	109	114	222	201	187	164	130	57	46	49
30	1.67	128	113	104	95		45.8962	40.5178	37.2907	34.0636		136	129	118	109		137	130	124	113		0.992701	0.992308	0.951613	0.964602		103	97	98	91	90	202	187	182	168		127	140	130	127		167	175	151	149		45	45	55
31	1.64	130	115	102	92	84	48.3343	42.7573	37.9239	34.2058	31.2314	139	132	117	110	102	140	135	125	108	103	0.992857	0.977778	0.936	1.01852	0.990291	101	93	94	90	93	236		188	180	174	146		137		126	173		162	160	120	46		49
[truncated: 9 more columns]
